# Supplementary material
Source: Elsevier journal article supplement (https://www.sciencedirect.com/science/article/pii/S0213911113000514)
Supplement: mmc1 [file S0213911113000514:mmc1.doc]

Appendix

Table I

Characteristics of the phase I population without diabetes that were or not followed up in phase II, Europeans aged 50 and over, 2004-2006.

|  | Male | | | |  | Female | | | |  |
| --- | --- | --- | --- | --- | --- | --- | --- | --- | --- | --- |
|  | Follow up | | Lost to follow up | |  | Follow up | | Lost to follow up | |  |
|  | n | (%) | n | (%) |  | n | (%) | n | (%) |  |
| *Age (years)* |  |  |  |  |  |  |  |  |  |  |
| 50-59 | 2,445 | (41.7) | 1,236 | (41.1) | a | 2,571 | (37.0) | 1,157 | (33.8) | a |
| 60-69 | 1,867 | (31.8) | 849 | (28.2) |  | 2,066 | (29.8) | 870 | (25.4) |  |
| 70-79 | 1,143 | (19.5) | 601 | (20.0) |  | 1,543 | (22.2) | 790 | (23.1) |  |
| 80-89 | 412 | (7.0) | 324 | (10.8) |  | 764 | (11.0) | 603 | (17.6) |  |
| *Educational level* |  |  |  |  |  |  |  |  |  |  |
| Lower secondary or less | 2,543 | (43.3) | 1,348 | (44.8) | a | 3,783 | (54.5) | 1,962 | (57.4) | a |
| Upper secondary or more | 3,324 | (56.7) | 1,662 | (55.2) |  | 3,160 | (45.5) | 1,458 | (42.6) |  |
| *BMI* |  |  |  |  |  |  |  |  |  |  |
| Underweight | 23 | (0.4) | 24 | (0.8) | a | 132 | (1.9) | 98 | (2.9) | a |
| Normal weight | 2,059 | (35.1) | 1,103 | (36.7) |  | 3,190 | (45.9) | 1,635 | (47.9) |  |
| Overweight | 2,895 | (49.3) | 1,469 | (48.8) |  | 2,462 | (35.5) | 1,196 | (35.0) |  |
| Obese | 889 | (15.2) | 413 | (13.7) |  | 1,159 | (16.7) | 483 | (14.2) |  |
| *Smoking* |  |  |  |  |  |  |  |  |  |  |
| Current | 1,411 | (24.0) | 777 | (25.8) |  | 1,130 | (16.3) | 580 | (17.0) |  |
| Never | 2,100 | (35.8) | 1,048 | (34.9) |  | 4,577 | (65.9) | 2,244 | (65.7) |  |
| Former | 2,356 | (40.2) | 1,181 | (39.3) |  | 1,236 | (17.8) | 590 | (17.3) |  |
| *Alcohol consumption* |  |  |  |  |  |  |  |  |  |  |
| No | 4,541 | (77.4) | 2,350 | (78.2) |  | 6,475 | (93.3) | 3,178 | (93.1) |  |
| Yes | 1,326 | (22.6) | 656 | (21.8) |  | 468 | (6.7) | 237 | (6.9) |  |
| *Physical inactivity* |  |  |  |  |  |  |  |  |  |  |
| No | 5,541 | (94.4) | 2,690 | (89.5) | a | 6,263 | (90.2) | 2,840 | (83.2) | a |
| Yes | 326 | (5.6) | 316 | (10.5) |  | 680 | (9.8) | 574 | (16.8) |  |
|  |  |  |  |  |  |  |  |  |  |  |
| *Total* | 5,867 | (100.0) | 3,010 | (100.0) |  | 6,944 | (100.0) | 3,420 | (100.0) |  |

a p-value <0,05.
